# Supplementary material
Source: PubMed Central journal article supplement (PMC4997831)
Supplement: AAC.00933-16_zac009165495so1.pdf [file AAC.00933-16_zac009165495so1.pdf]

## Supplementary Material

### Table of Contents

#### Tables

|          |   |
|----------|---|
| TABLE S1 | 2 |
| TABLE S2 | 3 |
| TABLE S3 | 3 |
| TABLE S4 | 3 |

#### Figures

|        |   |
|--------|---|
| FIG S1 | 4 |
| FIG S2 | 5 |
| FIG S3 | 6 |
| FIG S4 | 7 |

**TABLE S1 Summary of *Klebsiella pneumoniae* strains used for the phylogenetic tree and SNPs analysis**

| Strains     | Year        | NCBI accession number or SRA data base | Breadth of coverage (%) | Depth of coverage (fold) | No. of SNPs including recombination site | No. of SNPs excluding recombination site |
|-------------|-------------|----------------------------------------|-------------------------|--------------------------|------------------------------------------|------------------------------------------|
| reference   | before 1937 | FO834906                               | -                       | -                        | -                                        | -                                        |
| KUN4843*    | 2009        | DRX052508                              | 87.2                    | 46.0                     | 25,742                                   | 24,132                                   |
| KUN5033*    | 2009        | DRX052507                              | 83.3                    | 42.4                     | 25,741                                   | 24,131                                   |
| ERR1014123* | 2011        | ERR1014123                             | 84.9                    | 92.0                     | 27,063                                   | 25,068                                   |
| ERR204293   | unknown     | ERR204293                              | 86.5                    | 60.1                     | 26,883                                   | 24,976                                   |
| ERR303231   | unknown     | ERR303231                              | 90.2                    | 63.0                     | 25,769                                   | 23,610                                   |
| ERR303236   | unknown     | ERR303236                              | 80.1                    | 69.1                     | 27,170                                   | 25,530                                   |
| ERR317530*  | 2012        | ERR317530                              | 81.9                    | 62.3                     | 26,976                                   | 25,008                                   |
| ERR317531*  | 2012        | ERR317531                              | 81.0                    | 60.9                     | 26,976                                   | 25,008                                   |
| ERR317532*  | 2012        | ERR317532                              | 81.9                    | 56.5                     | 26,976                                   | 25,008                                   |
| ERR317533*  | 2012        | ERR317533                              | 80.6                    | 58.3                     | 26,976                                   | 25,008                                   |
| ERR317535*  | 2012        | ERR317535                              | 86.6                    | 62.4                     | 26,379                                   | 24,646                                   |
| ERR317536*  | 2012        | ERR317536                              | 85.9                    | 61.0                     | 26,379                                   | 24,646                                   |
| ERR323219   | unknown     | ERR323219                              | 84.9                    | 72.4                     | 26,049                                   | 24,334                                   |
| ERR323220   | unknown     | ERR323220                              | 87.0                    | 72.2                     | 26,050                                   | 24,335                                   |
| ERR323222   | unknown     | ERR323222                              | 82.3                    | 66.2                     | 26,050                                   | 24,335                                   |
| ERR455536   | unknown     | ERR455536                              | 82.4                    | 56.9                     | 26,691                                   | 24,791                                   |
| ERR455538   | unknown     | ERR455538                              | 81.1                    | 55.8                     | 26,695                                   | 24,795                                   |
| ERR459452   | unknown     | ERR459452                              | 83.6                    | 70.4                     | 27,690                                   | 24,315                                   |
| ERR459453   | unknown     | ERR459453                              | 87.1                    | 77.0                     | 27,689                                   | 24,315                                   |
| ERR459456   | unknown     | ERR459456                              | 81.0                    | 68.7                     | 27,208                                   | 25,138                                   |
| ERR459458   | unknown     | ERR459458                              | 85.5                    | 66.4                     | 25,392                                   | 23,245                                   |
| ERR559460   | unknown     | ERR559460                              | 83.7                    | 62.0                     | 25,592                                   | 23,916                                   |
| ERR706870   | unknown     | ERR706870                              | 87.0                    | 102.8                    | 26,796                                   | 25,002                                   |
| ERR712623   | unknown     | ERR712623                              | 90.3                    | 95.8                     | 26,777                                   | 24,980                                   |
| ERR712626   | unknown     | ERR712626                              | 88.8                    | 94.7                     | 26,798                                   | 25,005                                   |
| ERR712793   | unknown     | ERR712793                              | 85.6                    | 107.2                    | 26,786                                   | 24,995                                   |
| ERR712901   | unknown     | ERR712901                              | 86.6                    | 85.3                     | 26,753                                   | 24,963                                   |
| ERR713522   | unknown     | ERR713522                              | 86.3                    | 89.7                     | 26,765                                   | 24,975                                   |
| ERR926757*  | 2014        | ERR926757                              | 89.9                    | 99.8                     | 26,295                                   | 24,316                                   |
| SRR1510963* | 2012        | SRR1510963                             | 86.3                    | 96.5                     | 27,168                                   | 25,527                                   |
| SRR2033748* | 2012        | SRR2033748                             | 84.1                    | 70.3                     | 27,132                                   | 25,490                                   |
| SRR2244243  | unknown     | SRR2244243                             | 80.6                    | 98.7                     | 26,414                                   | 24,566                                   |
| SRR2724078* | 2007        | SRR2724078                             | 82.3                    | 90.0                     | 27,124                                   | 25,484                                   |
| SRR2724097* | 2012        | SRR2724097                             | 87.7                    | 92.8                     | 26,467                                   | 24,578                                   |
| SRR2724109* | 2012        | SRR2724109                             | 86.8                    | 99.7                     | 25,659                                   | 23,979                                   |
| SRR2724116* | 2013        | SRR2724116                             | 87.3                    | 88.6                     | 27,242                                   | 25,602                                   |
| SRR2724117* | 2013        | SRR2724117                             | 84.7                    | 111.2                    | 27,243                                   | 25,603                                   |
| Average     |             |                                        | 85.0 ± 2.9              | 76.4 ± 18.4              | 26,636 ± 589                             | 24,739 ± 564                             |

\* indicates the strains used for molecular clock analysis.

**TABLE S2 List of primers used in this study**

| Primer                               | Nucleotide sequence          | Amplicon size (bp) | Location                                   |
|--------------------------------------|------------------------------|--------------------|--------------------------------------------|
| <b>Used for gap closing</b>          |                              |                    |                                            |
| pKUN4507_2 L                         | 5'-CCCCACCACTCGACGATATG-3'   |                    | pKUN4507_2                                 |
| pKUN4507_2 R                         | 5'-CTCATCGCCAGAAGTGACGA-3'   |                    |                                            |
| <b>Used for conjugation analysis</b> |                              |                    |                                            |
| FwA16S                               | 5'-GCTTCACACGTCATACAATG-3'   | 200                | <i>Achromobacter xylosoxidans</i> 16S rRNA |
| RvA16S                               | 5'-TTCTGGTAAAACCCACTCC-3'    |                    |                                            |
| FwK16S                               | 5'-GCATTGAAAACCTGGCAGGCTA-3' | 383                | <i>Klebsiella pneumoniae</i> 16S rRNA      |
| RvK16S                               | 5'-CTCTGGAAAAGTTCTGTGGAT-3'  |                    |                                            |
| IMP19F                               | 5'-TTTCTAAACACGGTTTGGTG-3'   | 493                | <i>bla</i> <sub>IMP-19</sub>               |
| IMP19R                               | 5'-GAAACAACCAAGTTTTGCTTT-3'  |                    |                                            |

**TABLE S3 Summary of the strains used in the conjugation analysis**

| Isolates                          | Year | Conjugation analysis |
|-----------------------------------|------|----------------------|
| <i>Achromobacter xylosoxidans</i> |      |                      |
| KUN4507                           | 2009 | Donor                |
| <i>Klebsiella pneumoniae</i>      |      |                      |
| KUN4843                           | 2009 | Recipient            |
| <i>Escherichia coli</i>           |      |                      |
| ME8067                            | -    | Recipient            |
| ME8568                            | -    | Recipient            |

**TABLE S4 Summary of strains isolated from this patient**

| Isolates                          | Year | Total reads | Reads passing filter | % $\geq$ Q30 <sup>a</sup> | No. of contigs ( $\geq$ 0 bp) | No. of contigs ( $\geq$ 1000 bp) | N50 (bp) | NCBI accession number |
|-----------------------------------|------|-------------|----------------------|---------------------------|-------------------------------|----------------------------------|----------|-----------------------|
| <i>Achromobacter xylosoxidans</i> |      |             |                      |                           |                               |                                  |          |                       |
| KUN4507                           | 2009 | 1,225,422   | 1,200,026            | 80%                       | 148                           | 124                              | 82,254   | DRX052506             |
| <i>Klebsiella pneumoniae</i>      |      |             |                      |                           |                               |                                  |          |                       |
| KUN4843                           | 2009 | 1,215,126   | 1,199,009            | 81%                       | 98                            | 54                               | 361,546  | DRX052508             |
| KUN5033                           | 2009 | 1,149,922   | 1,134,327            | 82%                       | 135                           | 84                               | 330,754  | DRX052507             |

<sup>a</sup> % $\geq$ Q30 of filtered reads.

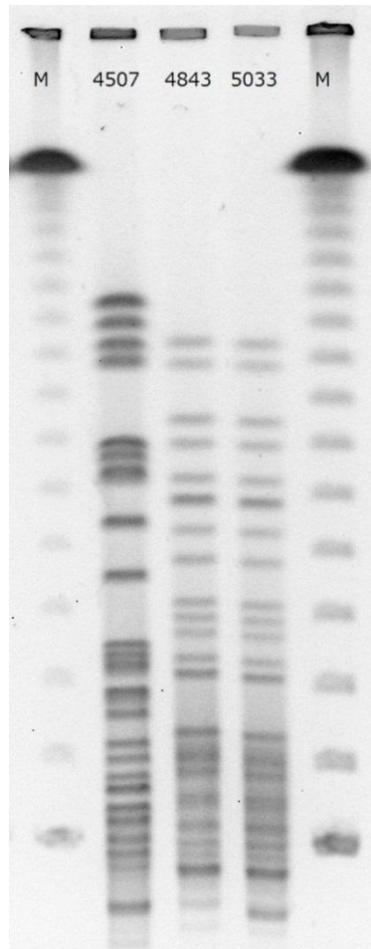

**FIG S1 Pulsed-Field Gel Electrophoresis of XbaI-digested genome.** M: lambda marker; 4507: *Achromobacter xylosoxidans* KUN4507 isolate; 4843: *Klebsiella pneumoniae* KUN4843 isolate; 5033: *K. pneumoniae* KUN503 isolate. *K. pneumoniae* KUN4843 and KUN5033 revealed the same PFGE pattern.

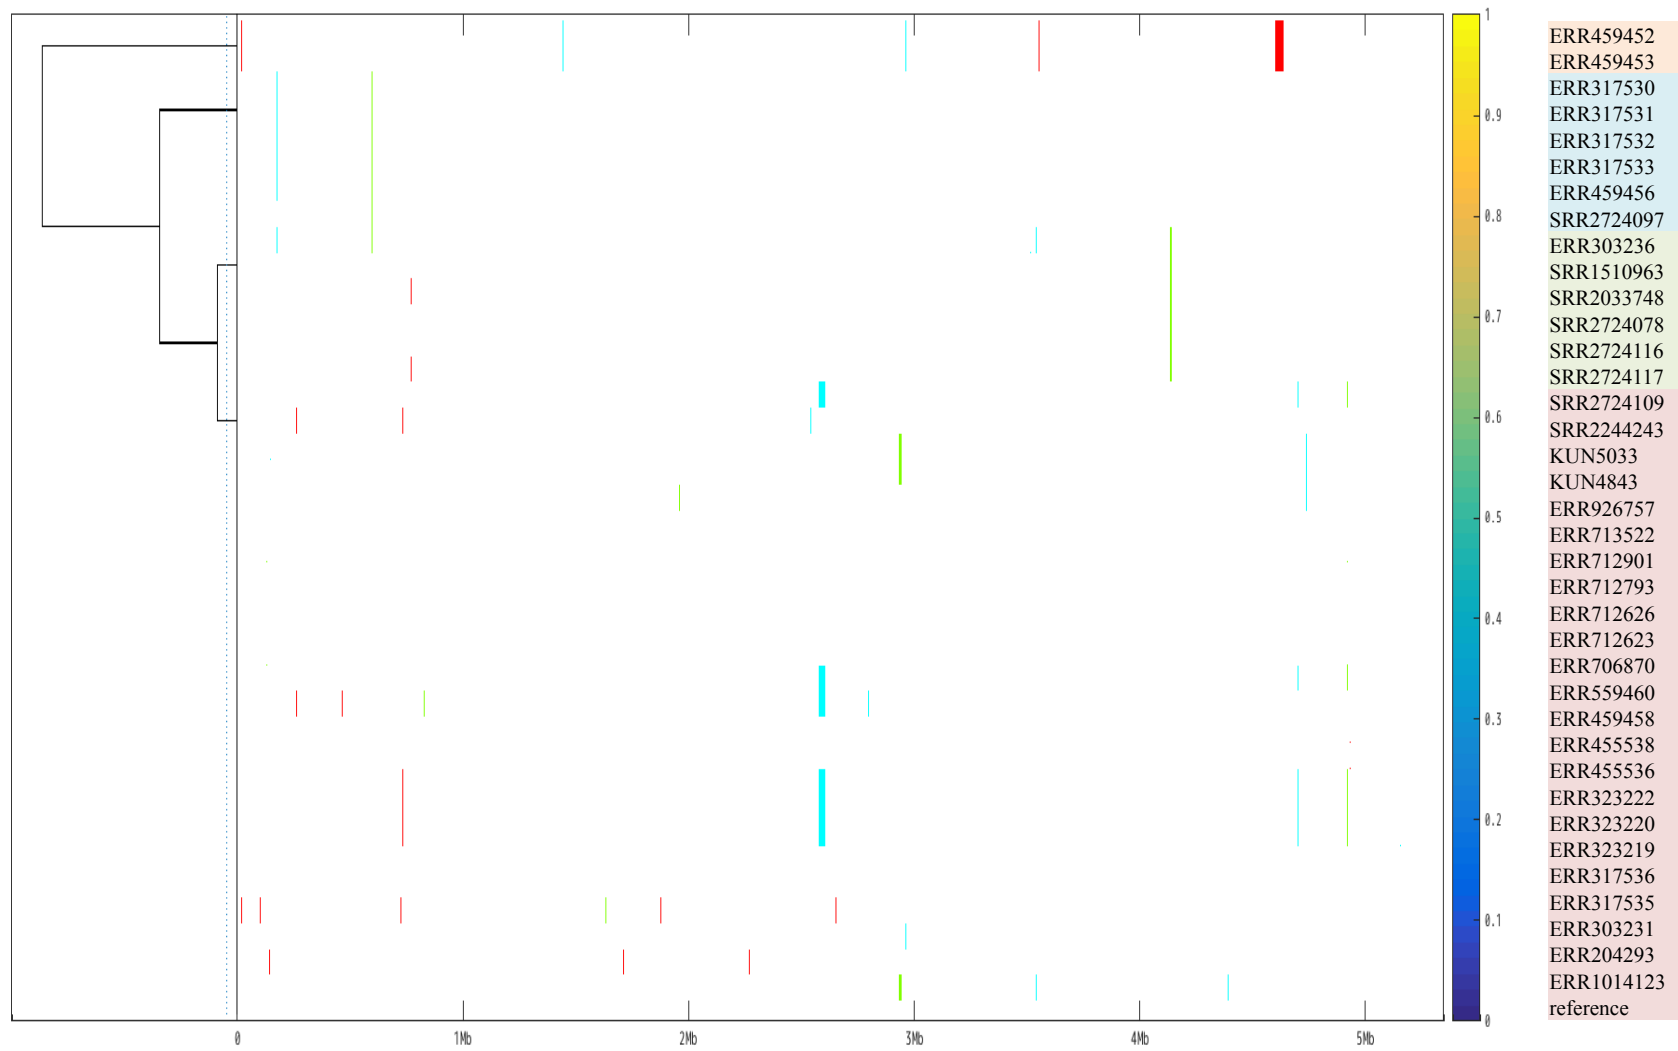

**FIG S2 Recombination site analysis.** A total of 346 recombination sites were detected using BRATNextGen. The total length of recombination site was 193,842 bp (average  $560 \pm 2,643$  bp).

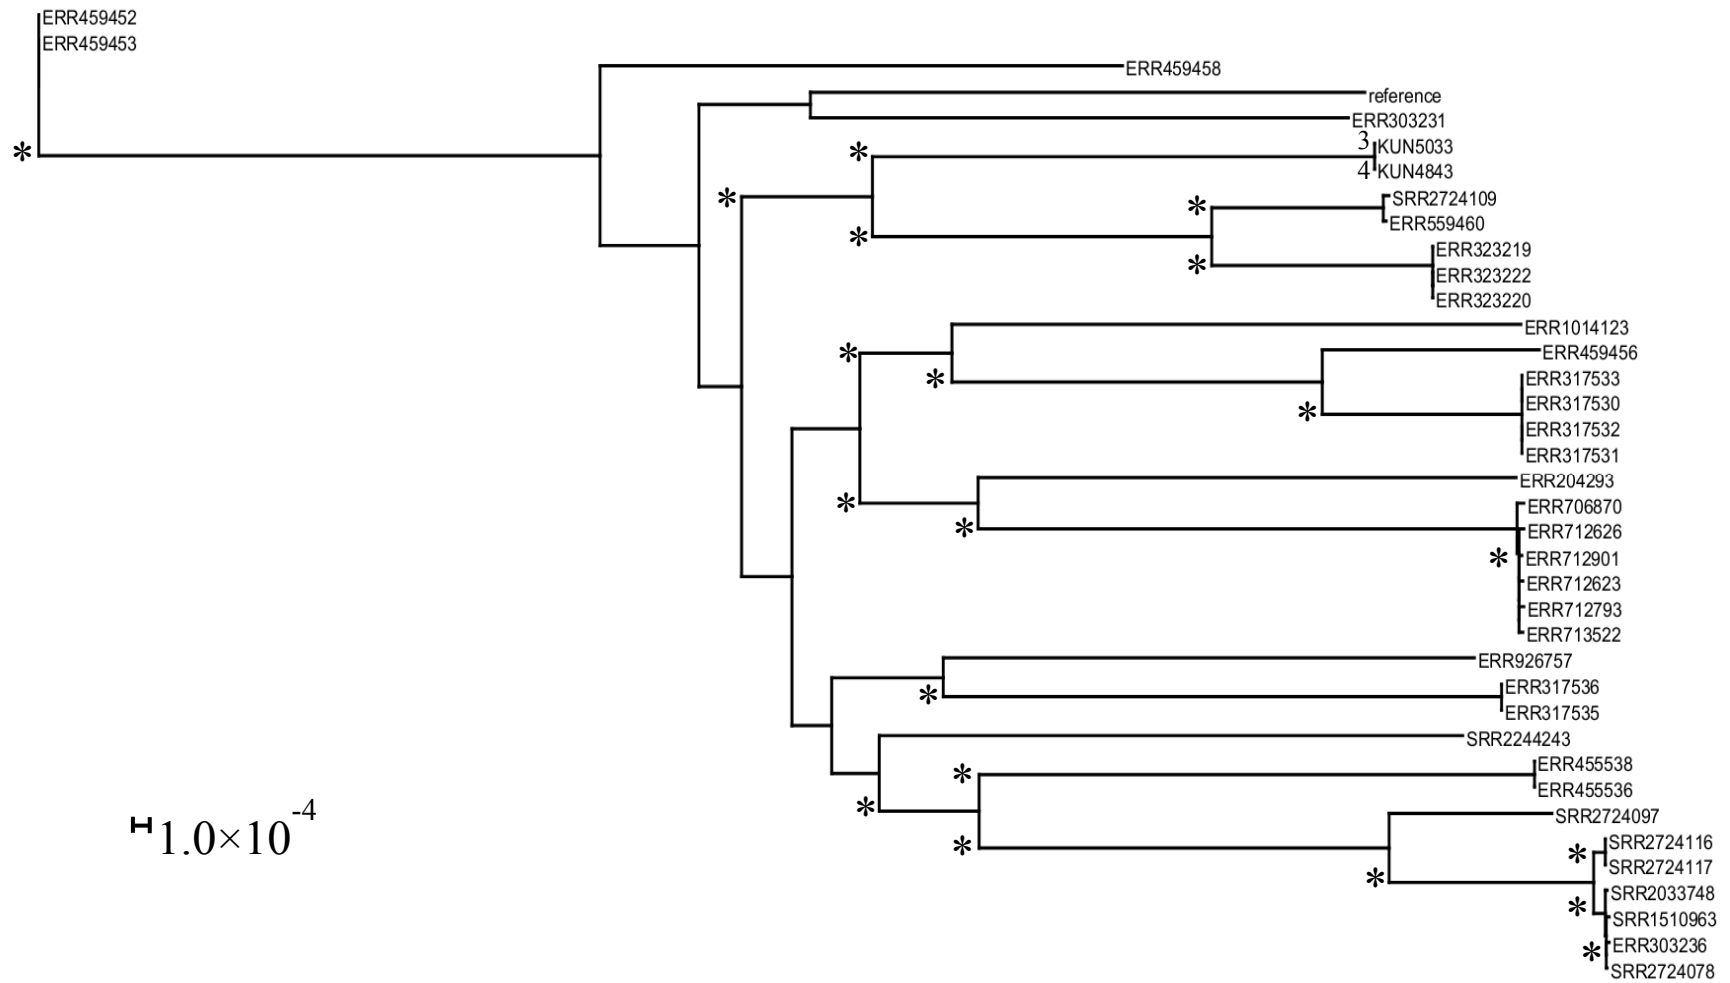

**FIG S3 Phylogenetic tree of 37 *Klebsiella pneumoniae* isolates.** The asterisk represents 100% bootstrap support. The scale bar indicates substitutions per SNP site. The numbers indicates number of distinguishing SNPs. *K. pneumoniae* KUN4843 encoded four SNPs from the most recent common ancestor and *K. pneumoniae* KUN5033 had three SNPs.

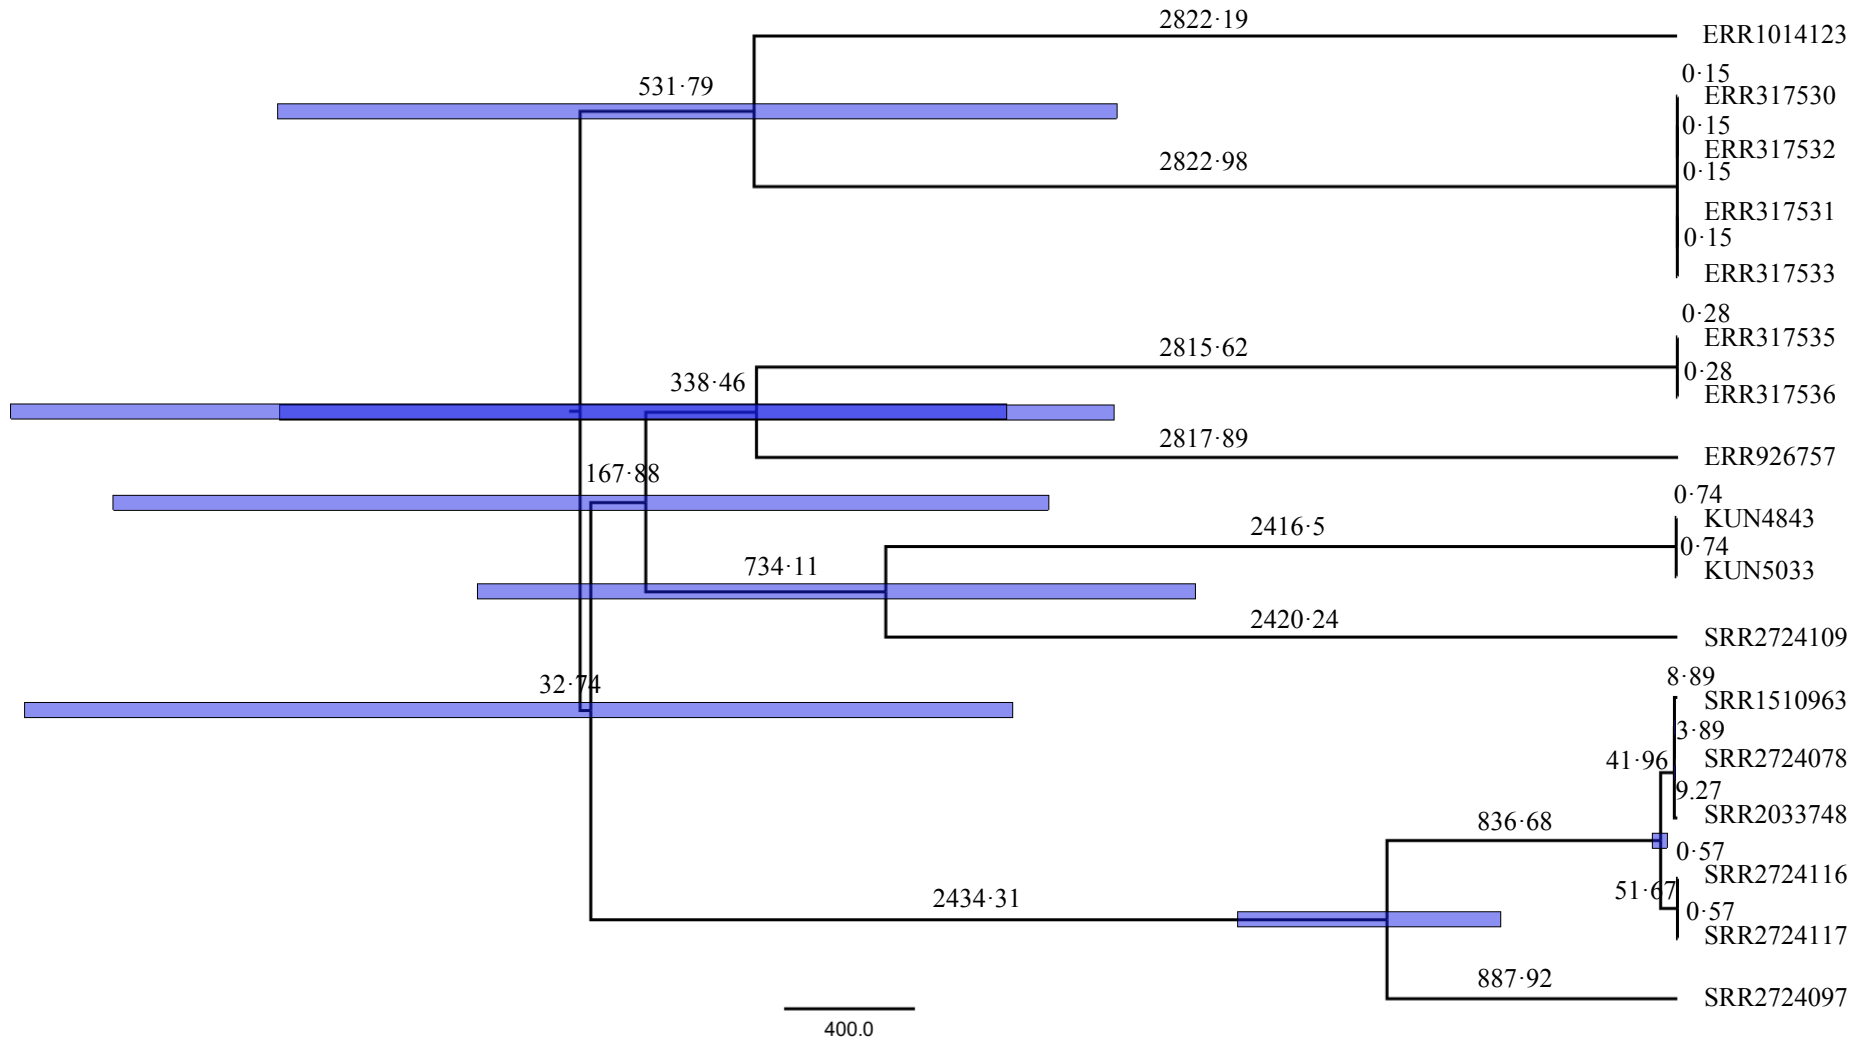

**FIG S4 Molecular clock analysis of 17 *Klebsiella pneumoniae* isolates.** The MRCA diverged into two groups of descendant 0.74 years before *K. pneumoniae* KUN4843 and KUN5033 appeared (95% highest posterior density [HPD]; 0.21-1.38).
